# Supplementary material
Source: publisher figshare collection journal article supplement (https://tandf.figshare.com/ndownloader/files/17504474)
Supplement: Supplementary file 1 [file 17504474]

**Appendix A**

| **related prime 1** | **related prime 2** | **unrelated prime** | **Set 1 targets** | **Set 2 targets** |
| --- | --- | --- | --- | --- |
| initial embeddings | | | | |
| bathart | bathell | woodarm | bath | bat |
| earthaim | earthief | tablecot | earth | ear |
| heartrich | heartroop | nurselaid | heart | hear |
| teamaction | teamission | boldfinger | team | tea |
| beeruncle | beerubber | fishnight | beer | bee |
| pawnoak | pawnumb | jokeway | pawn | paw |
| wingroast | wingroove | shoestone | wing | win |
| pierhusk | pierhyme | faceshow | pier | pie |
| pintradio | pintrauma | monkhorse | pint | pin |
| catchromp | catchrome | stagemaid | catch | cat |
| breadthrope | breadthroat | fashionwall | breadth | bread |
| scarflimp | scarfluff | dairypony | scarf | scar |
| pantworm | pantwist | highmeat | pant | pan |
| gasplecture | gasplankton | moonnostril | gasp | gas |
| plushyellow | plushygiene | imagecommon | plush | plus |
| dampsift | dampsalm | firemoth | damp | dam |
| bushoat | bushope | eyebase | bush | bus |
| barblunch | barbucket | wornstock | *barb | bar |
| thinglap | thinglue | blackgum | thing | thin |
| weirdwarp | weirdwarf | grasslong | weird | *weir |
| viewhaggle | viewhistle | ballbutter | view | *vie |
| paintrandom | paintriumph | watercenter | paint | pain |
| cartregal | cartrophy | snowchild | cart | car |
| beardromp | beardrown | classgate | beard | bear |
| clanglounge | clanglimpse | lightdragon | *clang | clan |
| hemployal | hemplanet | softwaste | *hemp | *hem |
| tramphalo | tramphoto | watchdown | tramp | tram |
| rumprisk | rumproud | footmate | rump | rum |
| starthoney | startheory | greenprint | start | star |
| pitchlentil | pitchlorine | grantcandle | pitch | pit |
| final embeddings | | | | |
| furflow | turflow | payship | flow | low |
| hunthedge | monthedge | backstick | hedge | edge |
| swimbowl | climbowl | handcamp | bowl | owl |
| focustrack | robustrack | standsheep | track | rack |
| jamproof | jumproof | tubboard | proof | roof |
| pizzaground | zigzaground | brainmaster | ground | round |
| cellowheel | fellowheel | sharespace | wheel | heel |
| gringlance | slinglance | landmother | glance | lance |
| taxichair | musichair | beatsteam | chair | hair |
| jardrug | yardrug | cupfork | drug | rug |
| rawnarrow | dawnarrow | flyscreem | narrow | arrow |
| ashflip | deaflip | cutlift | flip | lip |
| pramplace | stamplace | datecheck | place | lace |
| mealthrough | wealthrough | washmansion | through | rough |
| collarbridge | rhubarbridge | battleleader | bridge | ridge |
| fouldwell | mouldwell | capesharp | dwell | well |
| tarbladder | curbladder | hotmustard | bladder | ladder |
| scumplunge | sharplunge | timefriend | plunge | lunge |
| scramprecede | shrimprecede | northmonster | precede | recede |
| finglisten | ringlisten | icelicense | *glisten | listen |
| striptwitch | scriptwitch | prawnspring | twitch | witch |
| cheftreason | shiftreason | rainorchard | treason | reason |
| kinspot | lenspot | matplay | spot | pot |
| dincrib | zincrib | allshop | crib | rib |
| nountray | mountray | cardglow | tray | ray |
| warkill | darkill | inkshot | kill | ill |
| slowneat | clowneat | slapeast | neat | eat |
| pewdraft | lewdraft | boxmatch | draft | raft |
| oilthrust | filthrust | manhunger | thrust | rust |
| diefrank | reefrank | oldonion | frank | rank |
